# Supplementary material for: Malt in Combination with Lactobacillus rhamnosus Increases Concentrations of Butyric Acid in the Distal Colon and Serum in Rats Compared with Other Barley Products but Decreases Viable Counts of Cecal Bifidobacteria
Source: PubMed Central journal article supplement — J Nutr. 2010 Nov 24;141(1):101–7. doi: 10.3945/jn.110.122226 (PMC3001238; doi:10.3945/jn.110.122226), 2010-11-24
Supplement: supp_jn.110.122226_nut122226-file003.pdf [file supp_jn.110.122226_nut122226-file003.pdf]

**SUPPLEMENTAL TABLE 3** Total concentrations and proportions of amino acids and NH<sub>4</sub> in portal plasma of rats fed WGB, malt and BSG diets for 12 d and the same diets supplemented with *Lactobacillus rhamnosus*<sup>1</sup>

|                     | WGB                    |                         | Malt                    |                         | BSG                    |                        | 2-way Anova<br>P-values |                 |          |
|---------------------|------------------------|-------------------------|-------------------------|-------------------------|------------------------|------------------------|-------------------------|-----------------|----------|
|                     | -Lr <sup>2</sup>       | +Lr                     | -Lr                     | +Lr                     | -Lr                    | +Lr                    | Fiber                   | Lr              | Fiber×Lr |
| Serine, %           | 6.3 ± 0.2              | 5.9 ± 0.2               | 6.2 ± 0.2               | 6.0 ± 0.2               | 7.0 ± 0.2              | 6.5 ± 0.3              | 0.008 <sup>3</sup>      | NS <sup>4</sup> | NS       |
| Glutamic acid, %    | 2.7 ± 0.2              | 2.8 ± 0.1               | 2.6 ± 0.2               | 3.0 ± 0.3               | 2.5 ± 0.2              | 2.9 ± 0.1              | NS                      | 0.037           | NS       |
| Glutamine, %        | 14.0 ± 0.4             | 11.8 ± 0.3              | 11.6 ± 0.3              | 11.4 ± 0.6              | 12.5 ± 0.7             | 13.0 ± 0.7             | 0.030 <sup>5</sup>      | NS              | NS       |
| Tyrosine, %         | 1.6 ± 0.1              | 1.6 ± 0.1               | 1.5 ± 0.0               | 1.6 ± 0.1               | 1.3 ± 0.1              | 1.6 ± 0.1              | NS                      | 0.038           | NS       |
| Histidine, %        | 1.9 ± 0.2 <sup>b</sup> | 2.3 ± 0.2 <sup>ab</sup> | 2.3 ± 0.1 <sup>ab</sup> | 2.3 ± 0.1 <sup>ab</sup> | 2.6 ± 0.1 <sup>a</sup> | 2.1 ± 0.2 <sup>b</sup> | NS                      | NS              | 0.024    |
| NH <sub>4</sub> , % | 8.2 ± 0.3              | 10.7 ± 0.8              | 11.4 ± 0.9              | 12.5 ± 0.5              | 8.1 ± 0.2              | 10.1 ± 1.1             | 0.001 <sup>6</sup>      | 0.004           | NS       |
| Total, mmol/L       | 5.0 ± 0.5              | 5.6 ± 0.6               | 4.8 ± 0.5               | 4.3 ± 0.4               | 5.5 ± 0.6              | 5.4 ± 0.7              | NS                      | NS              | NS       |

<sup>1</sup>Values are means ± SEM, n = 7-5. Means in a row without a common letter differ, P<0.05

<sup>2</sup>Lr, *Lactobacillus rhamnosus* 271

<sup>3</sup>Values for groups fed malt were significantly lower than those fed BSG

<sup>4</sup>NS, not significant, P≥0.05

<sup>5</sup>Values for groups fed malt were significantly lower than those fed WGB and BSG

<sup>6</sup>Values for groups fed malt were significantly higher than those fed WGB and BSG
