# Supplementary material for: Malt in Combination with Lactobacillus rhamnosus Increases Concentrations of Butyric Acid in the Distal Colon and Serum in Rats Compared with Other Barley Products but Decreases Viable Counts of Cecal Bifidobacteria
Source: PubMed Central journal article supplement — J Nutr. 2010 Nov 24;141(1):101–7. doi: 10.3945/jn.110.122226 (PMC3001238; doi:10.3945/jn.110.122226), 2010-11-24
Supplement: supp_jn.110.122226_nut122226_T01.pdf [file supp_jn.110.122226_nut122226_T01.pdf]

**SUPPLEMENTAL TABLE 1** Composition of the WGB, malt and BSG experimental diets(-Lr) and the same diets supplemented with *Lactobacillus rhamnosus* 271 (+Lr)

|                               | WGB                | Malt               | BSG                |
|-------------------------------|--------------------|--------------------|--------------------|
|                               | -Lr/+Lr            | -Lr/+Lr            | -Lr/+Lr            |
|                               |                    | <i>g/kg dry wt</i> |                    |
| WGB <sup>1</sup>              | 519.5 <sup>2</sup> | 0                  | 0                  |
| Malt <sup>3</sup>             | 0                  | 661.2 <sup>2</sup> | 0                  |
| BSG <sup>3</sup>              | 0                  | 0                  | 135.8 <sup>2</sup> |
| Casein <sup>4</sup>           | 120                | 120                | 120                |
| DL-methionine <sup>4</sup>    | 1.2                | 1.2                | 1.2                |
| Corn oil                      | 50                 | 50                 | 50                 |
| Mineral mixture <sup>4</sup>  | 48                 | 48                 | 48                 |
| Vitamin mixture <sup>5</sup>  | 8                  | 8                  | 8                  |
| Choline chloride <sup>4</sup> | 2                  | 2                  | 2                  |
| Sucrose                       | 100                | 100                | 100                |
| Wheat starch <sup>6</sup>     | 151.3              | 9.6                | 535.0              |

<sup>1</sup>Viking Malt AB (Halmstad, Sweden).<sup>2</sup>Corresponding to 80 g dietary fiber/kg dry diet<sup>3</sup>Carlsberg (Falkenberg, Sweden).<sup>4</sup>Sigma Aldrich, St Louis, MO.<sup>5</sup>Containing (g/kg): 0.37 CuSO<sub>4</sub>·5H<sub>2</sub>O, 1.4 ZnSO<sub>4</sub>·7H<sub>2</sub>O, 332.1 KH<sub>2</sub>PO<sub>4</sub>, 171.8 NaH<sub>2</sub>PO<sub>4</sub>·2H<sub>2</sub>O, 324.4 CaCO<sub>3</sub>, 0.068 KI, 57.2 MgSO<sub>4</sub>, 7.7 FeSO<sub>4</sub>·7H<sub>2</sub>O, 3.4 MnSO<sub>4</sub>·H<sub>2</sub>O, 0.02 CoCl<sub>2</sub>·6H<sub>2</sub>O, 101.7 NaCl (Bie & Berntsen A-S, Rødovre, Denmark).<sup>6</sup>Containing (g/kg): 0.62 menadione, 2.5 thiamin hydrochloride, 2.5 riboflavin, 1.25 pyridoxine hydrochloride, 6.25 calcium pantothenate, 6.25 nicotinic acid, 0.25 folic acid, 12.5 inositol, 1.25 p-aminobenzoic acid, 0.05 biotin, 0.00375 cyanocobalamin, 0.187 retinol palmitate, 0.00613 calciferol, 25 d- $\alpha$ -tocopheryl acetate, 941.25 maize starch (Apoteket, Malmö, Sweden).<sup>7</sup>Wheat starch (Cerestar, Krefeld, Germany).
