# Supplementary material for: Malt in Combination with Lactobacillus rhamnosus Increases Concentrations of Butyric Acid in the Distal Colon and Serum in Rats Compared with Other Barley Products but Decreases Viable Counts of Cecal Bifidobacteria
Source: PubMed Central journal article supplement — J Nutr. 2010 Nov 24;141(1):101–7. doi: 10.3945/jn.110.122226 (PMC3001238; doi:10.3945/jn.110.122226), 2010-11-24
Supplement: supp_jn.110.122226_nut122226_T02.pdf [file supp_jn.110.122226_nut122226_T02.pdf]

**SUPPLEMENTAL TABLE 2** Composition, total content and intake of amino acids and NH<sub>4</sub> in rats fed WGB, malt and BSG diets for 12 d, and the same diets supplemented with *Lactobacillus rhamnosus* 271<sup>1</sup>

|                                  | WGB       | Malt      | BSG       |
|----------------------------------|-----------|-----------|-----------|
| Composition, %                   |           |           |           |
| Asparagine                       | 6         | 7         | 7         |
| Threonine                        | 3         | 4         | 4         |
| Serine                           | 5         | 4         | 4         |
| Glutamic acid                    | 23        | 20        | 20        |
| Proline                          | 12        | 11        | 10        |
| Glycine                          | 4         | 4         | 4         |
| Alanine                          | 4         | 5         | 5         |
| Valine                           | 5         | 6         | 6         |
| Cysteine                         | 3         | 3         | 2         |
| Methionine                       | 2         | 2         | 2         |
| Isoleucine                       | 4         | 4         | 4         |
| Leucine                          | 7         | 7         | 8         |
| Tyrosine                         | 3         | 3         | 4         |
| Phenylalanine                    | 5         | 5         | 6         |
| Lysine                           | 4         | 4         | 4         |
| Histidine                        | 2         | 3         | 2         |
| Arginine                         | 5         | 5         | 5         |
| NH <sub>4</sub>                  | 3         | 3         | 2         |
| Total content, g/100 g dry wt    | 9.7       | 9.5       | 24.3      |
| Total intake, g/5 d <sup>2</sup> | 2.9 ± 0.0 | 3.7 ± 0.0 | 1.9 ± 0.0 |

<sup>1</sup>The standard deviation was less than 8%

<sup>2</sup>The results from the 2 groups with and without *Lactobacillus rhamnosus* 271 for each barley product were pooled
